# Supplementary material
Source: HighWire-hosted journal article supplement (https://www.cmajopen.ca/highwire/filestream/85614/field_highwire_adjunct_files/6/2020-0248-7-at.pdf)
Supplement: 2020-0248-7-at.pdf [file 2020-0248-7-at.pdf]

## Funnel Plots

Overall Nutrition Interventions

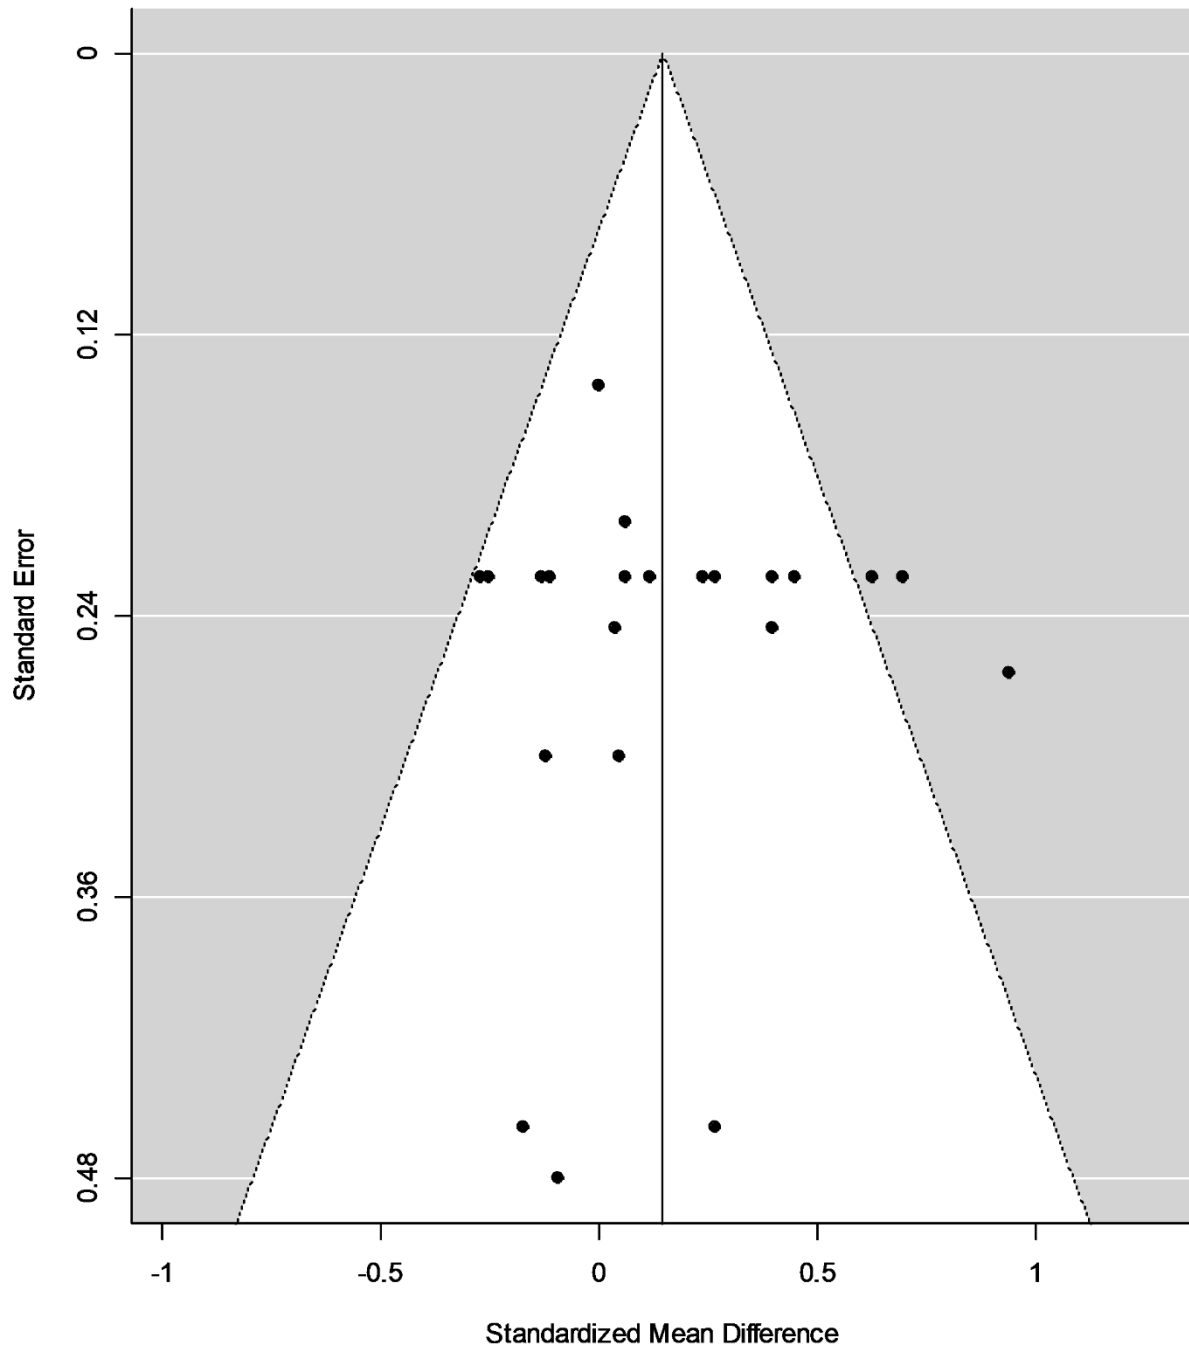

Supplemental Figure S1: Mobility outcome meta-analysis studies

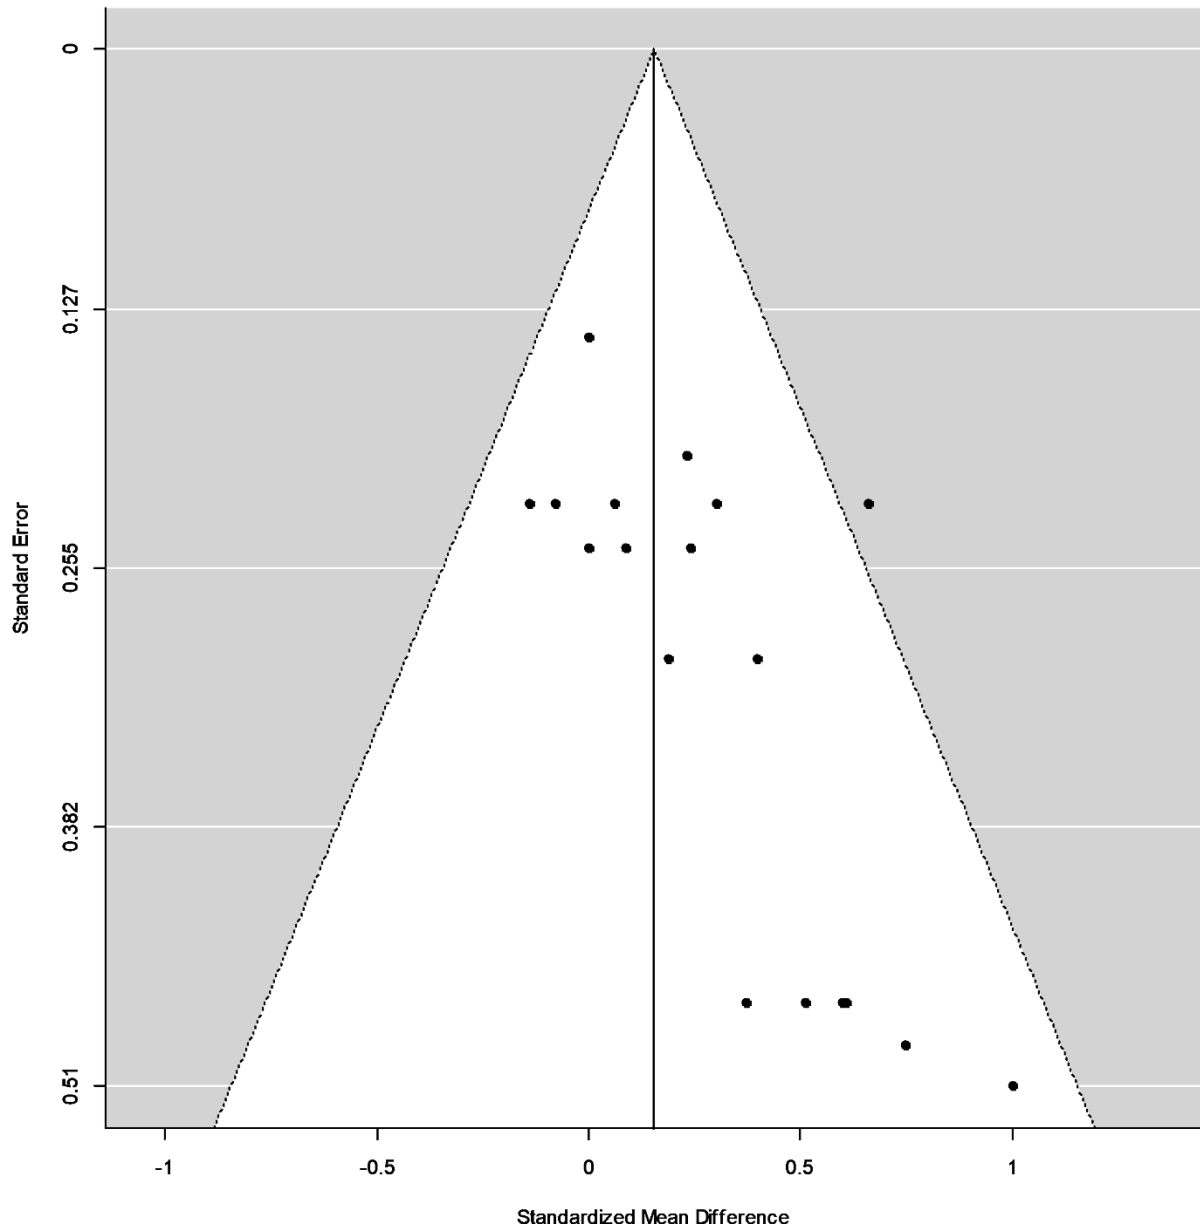

Supplemental Figure S2: Physical outcomes meta-analysis studies

Protein Supplementation Interventions

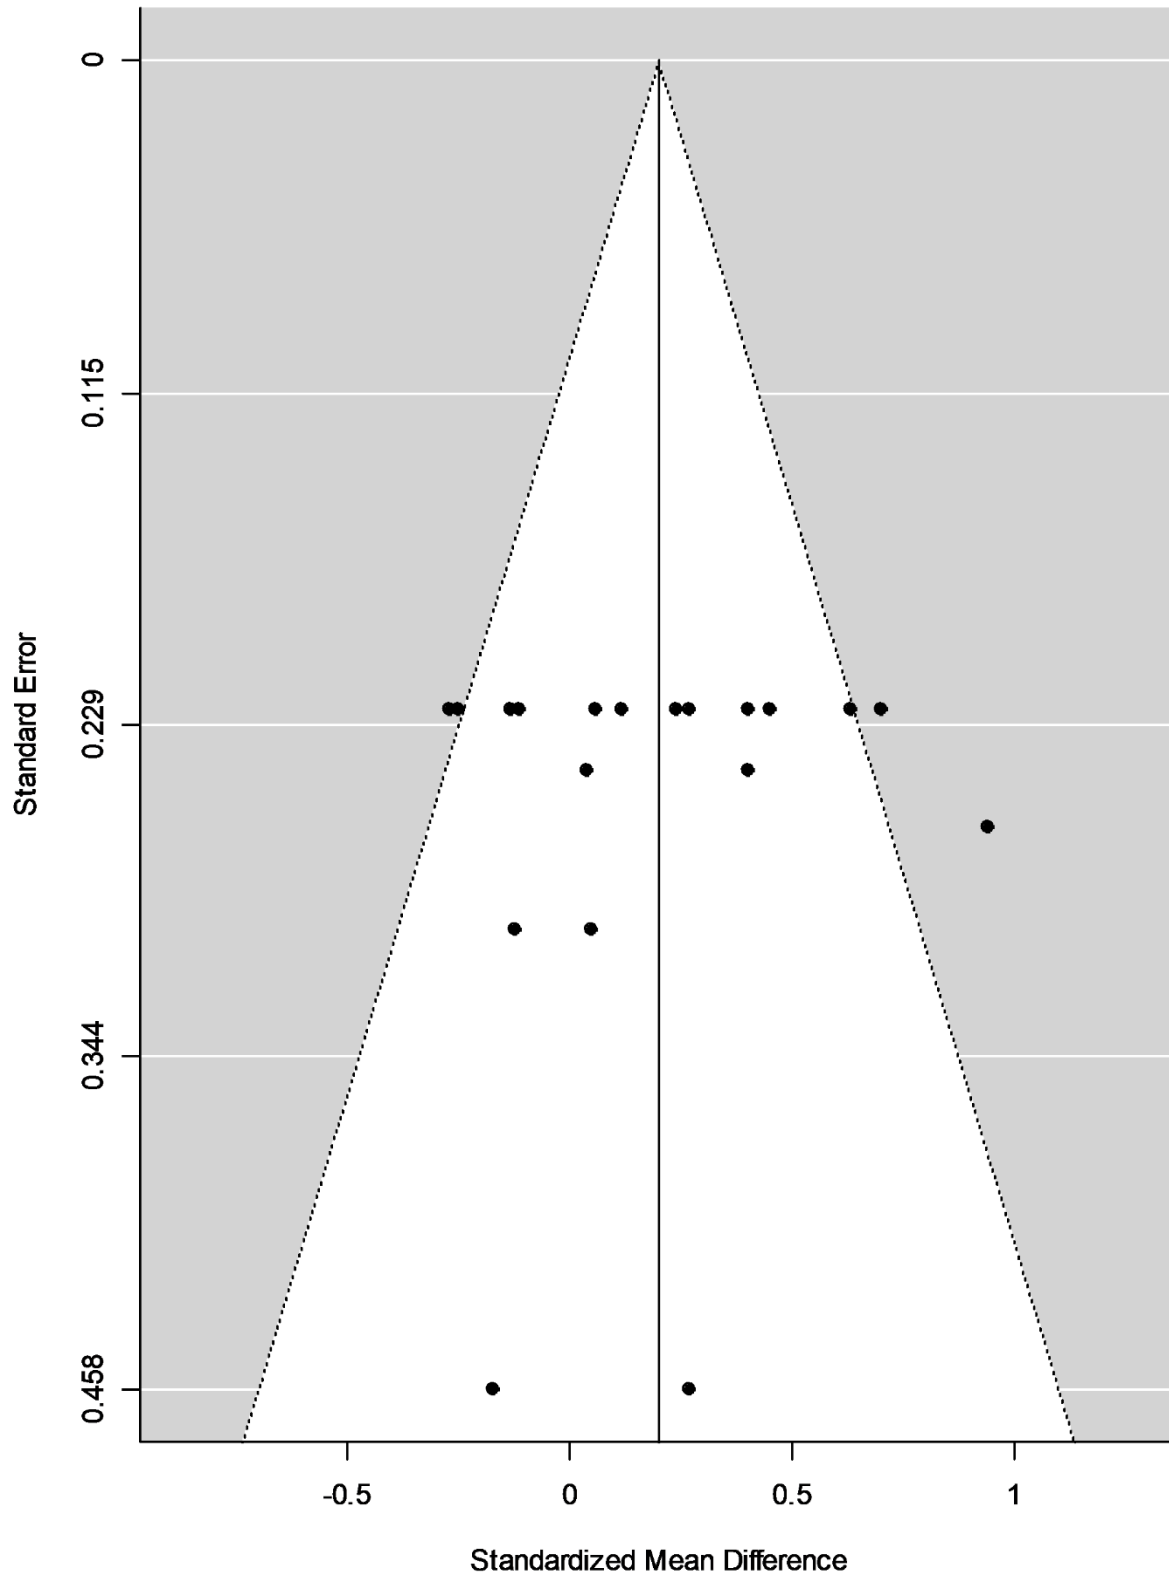

Supplemental Figure S3: Mobility outcome meta-analysis studies

Appendix 7, as supplied by the authors. Appendix to: Racey M, Ali MU, Sherifali D, et al. Effectiveness of nutrition and combined nutrition and physical activity interventions in older adults with frailty or prefrailty: a systematic review and meta-analysis. *CMAJ Open* 2021. DOI:10.9778/cmajo.20200248. Copyright © 2021 The Author(s) or their employer(s). To receive this resource in an accessible format, please contact us at [cmajgroup.cmajca](mailto:cmajgroup.cmajca).

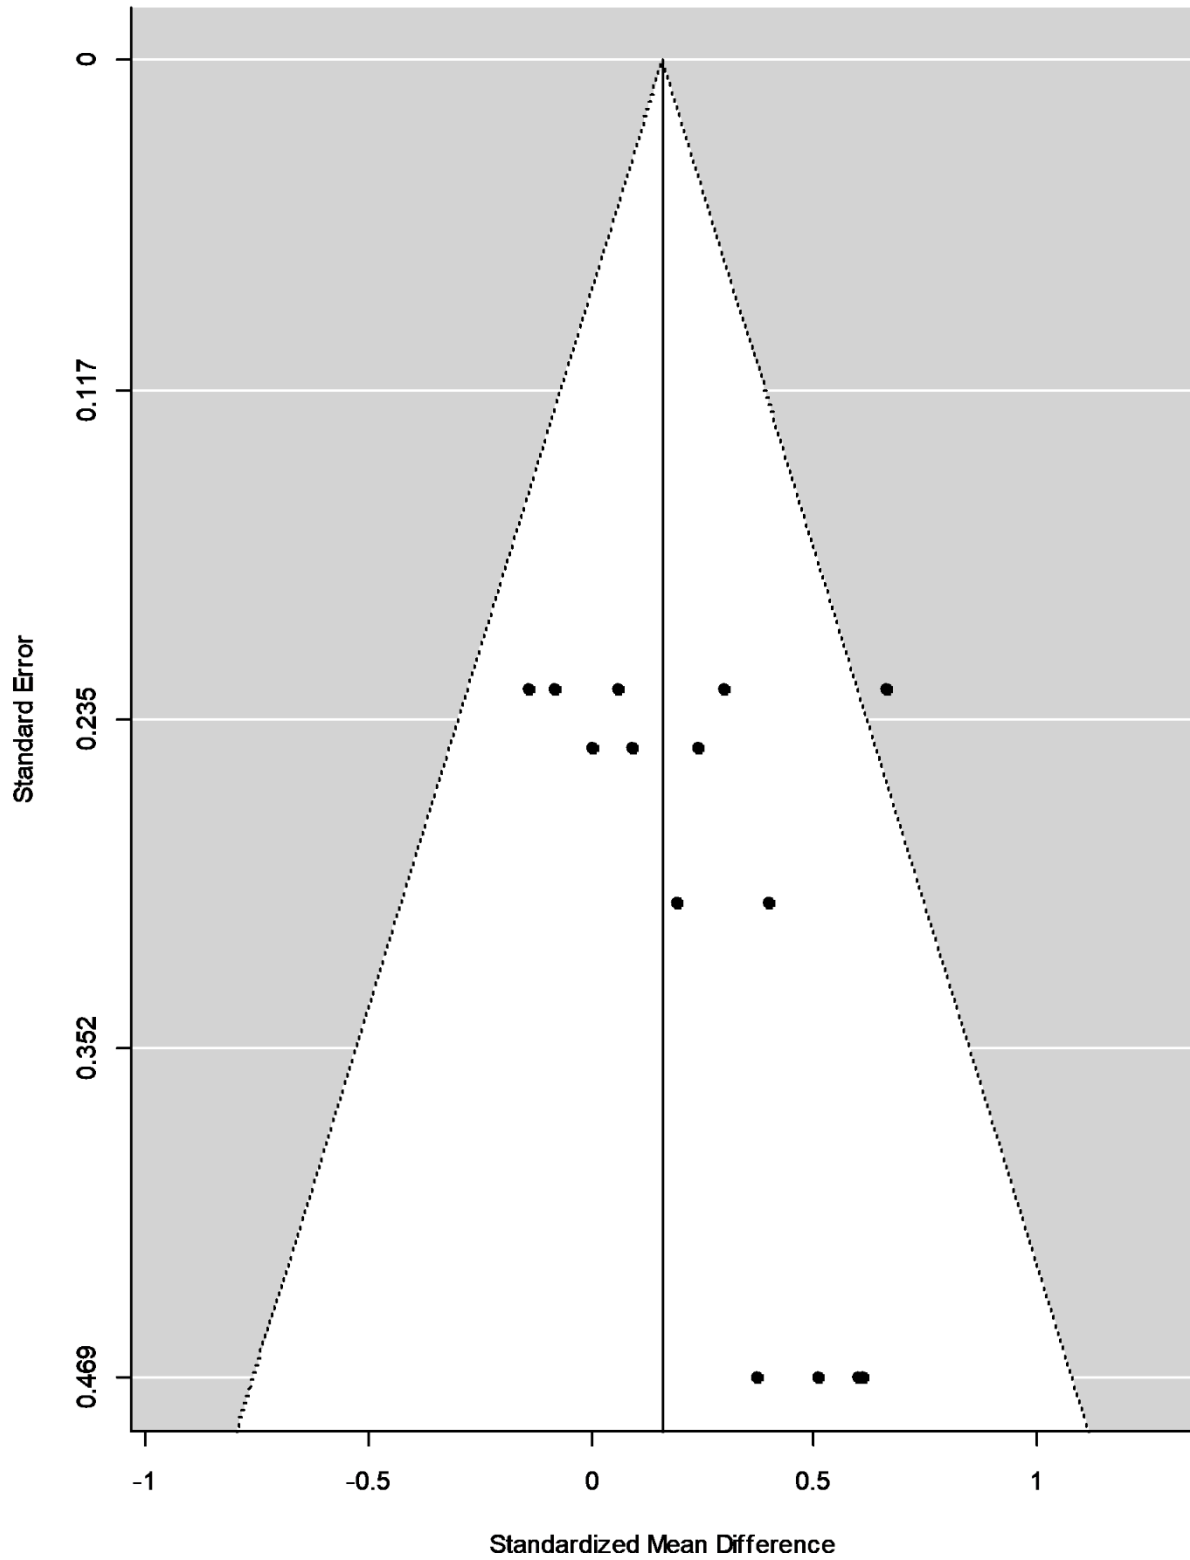

Supplemental Figure S4: Physical outcomes meta-analysis studies

Combined Approach Interventions

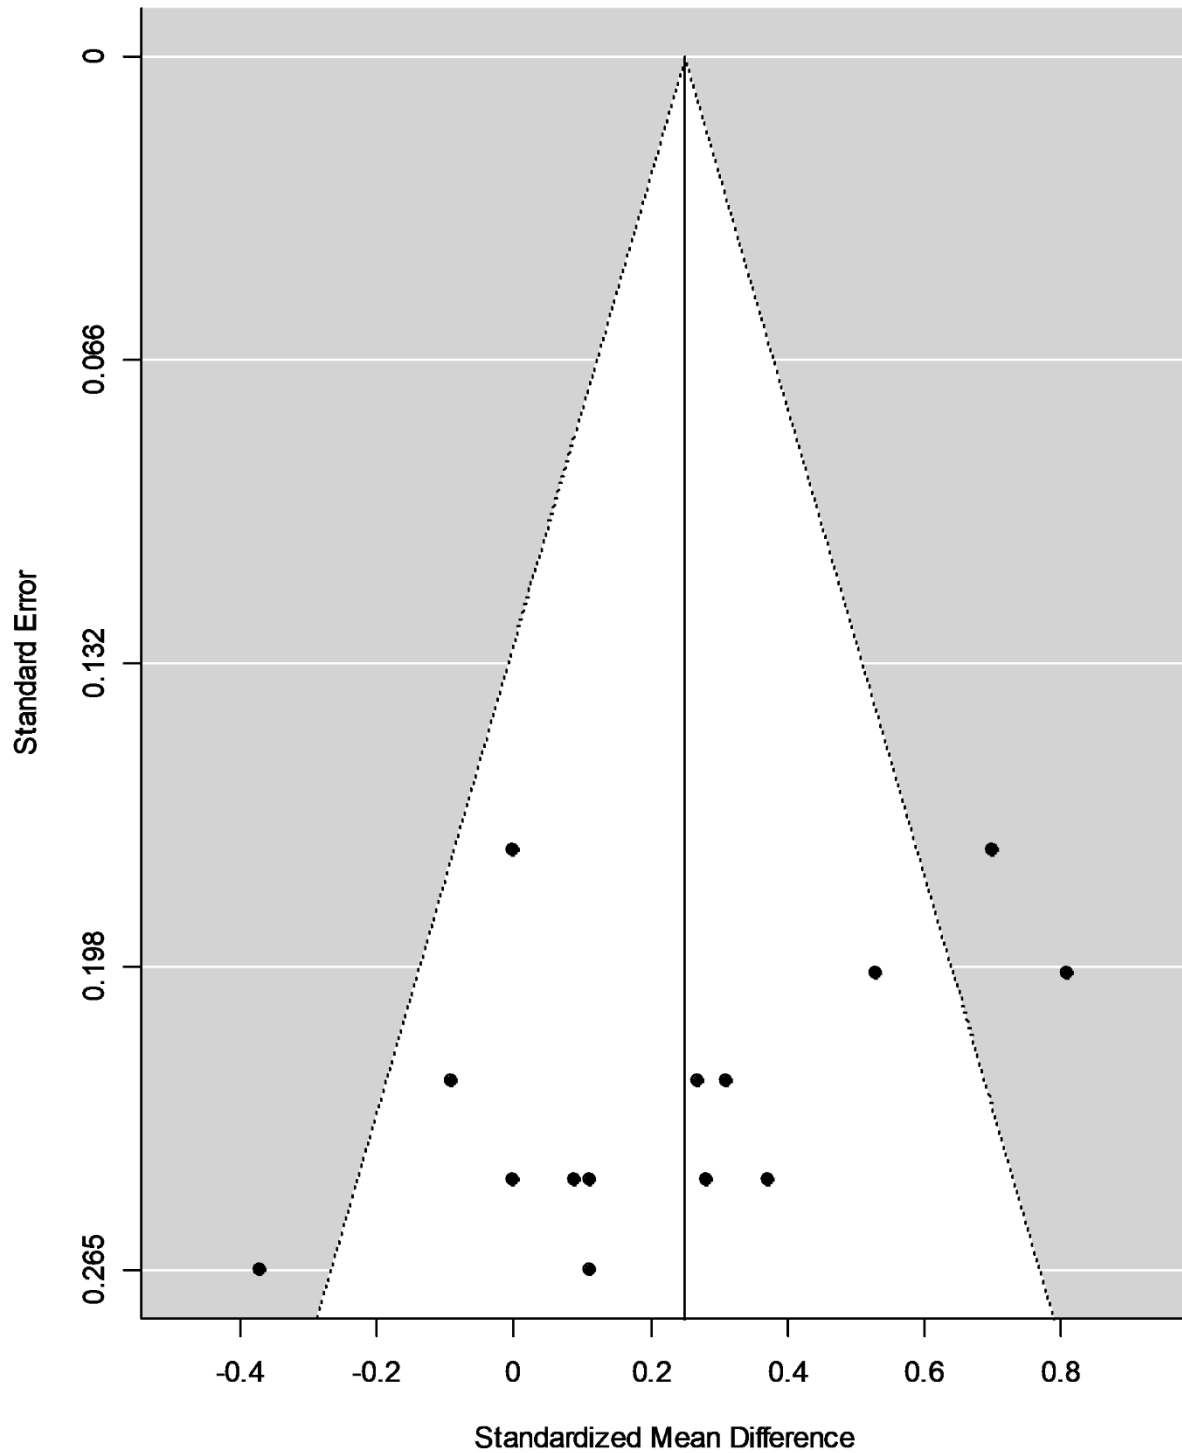

Supplemental Figure S5: Mobility outcome meta-analysis studies

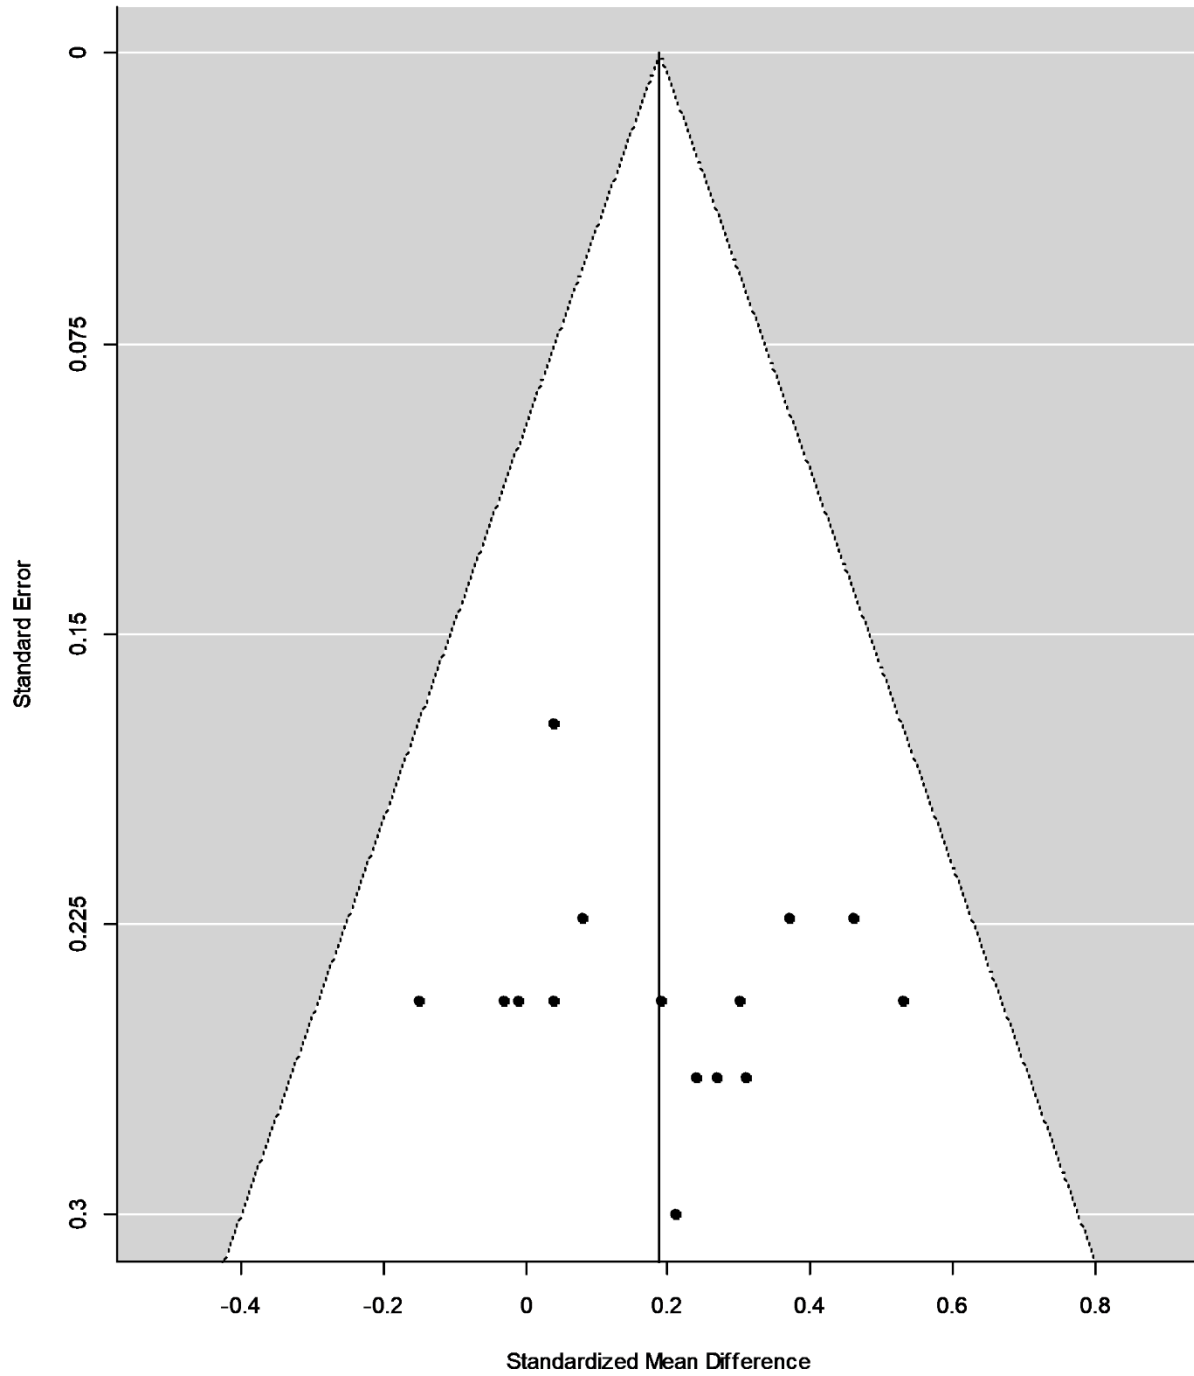

Supplemental Figure S6: Physical outcomes meta-analysis studies
